# Supplementary figures and images for: Tempol ameliorates polycystic ovary syndrome through attenuating intestinal oxidative stress and modulating of gut microbiota composition-serum metabolites interaction
Source: PubMed Central journal article supplement — Redox Biol. 2021 Feb 3;41:101886. doi: 10.1016/j.redox.2021.101886 (PMC7896192; doi:10.1016/j.redox.2021.101886), 2021-02-03

**A**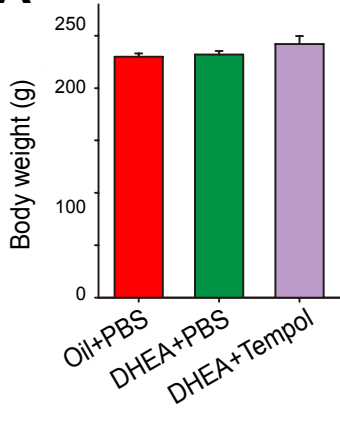**B**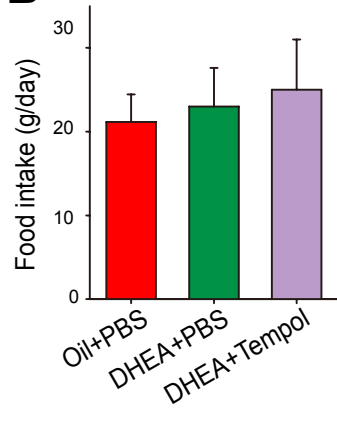

Supplement: mmc1.pdf [file mmc1.pdf]

**A**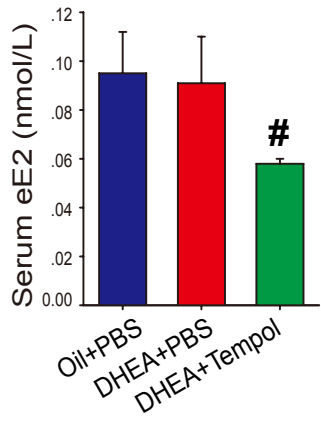**B**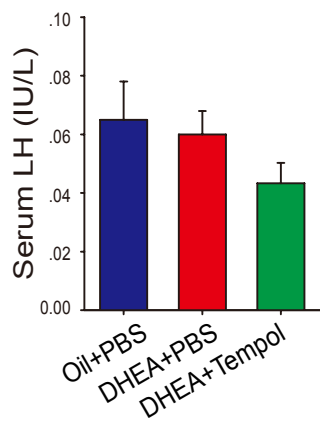**C**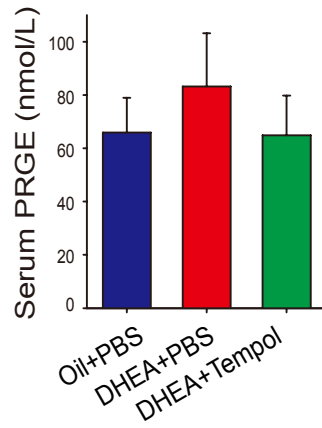**D**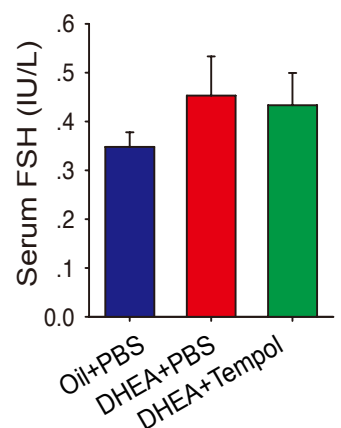

Supplement: mmc2.pdf [file mmc2.pdf]

**A****Length Distribution**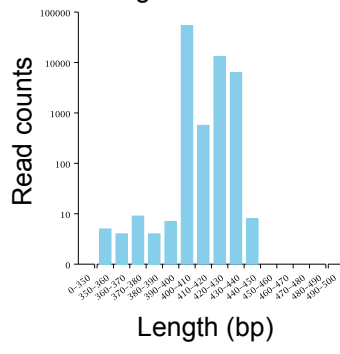

Supplement: mmc3.pdf [file mmc3.pdf]

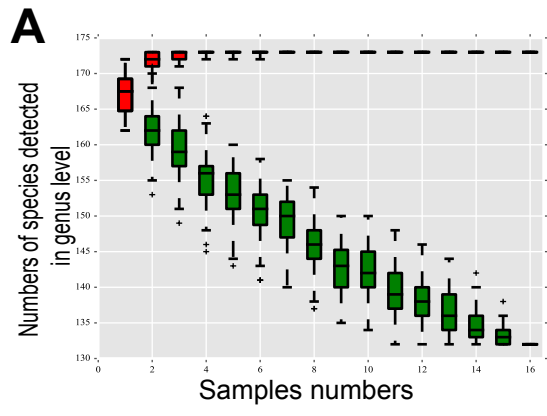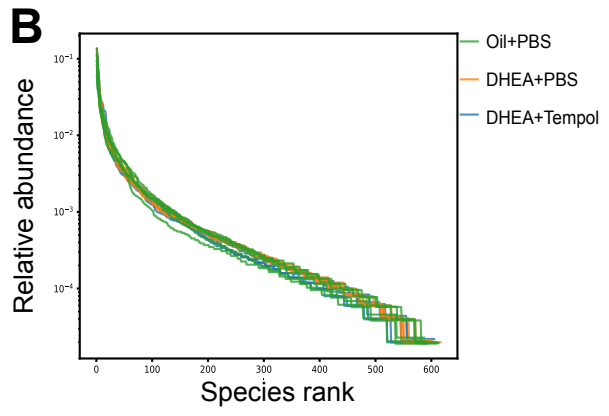

Supplement: mmc4.pdf [file mmc4.pdf]

**A**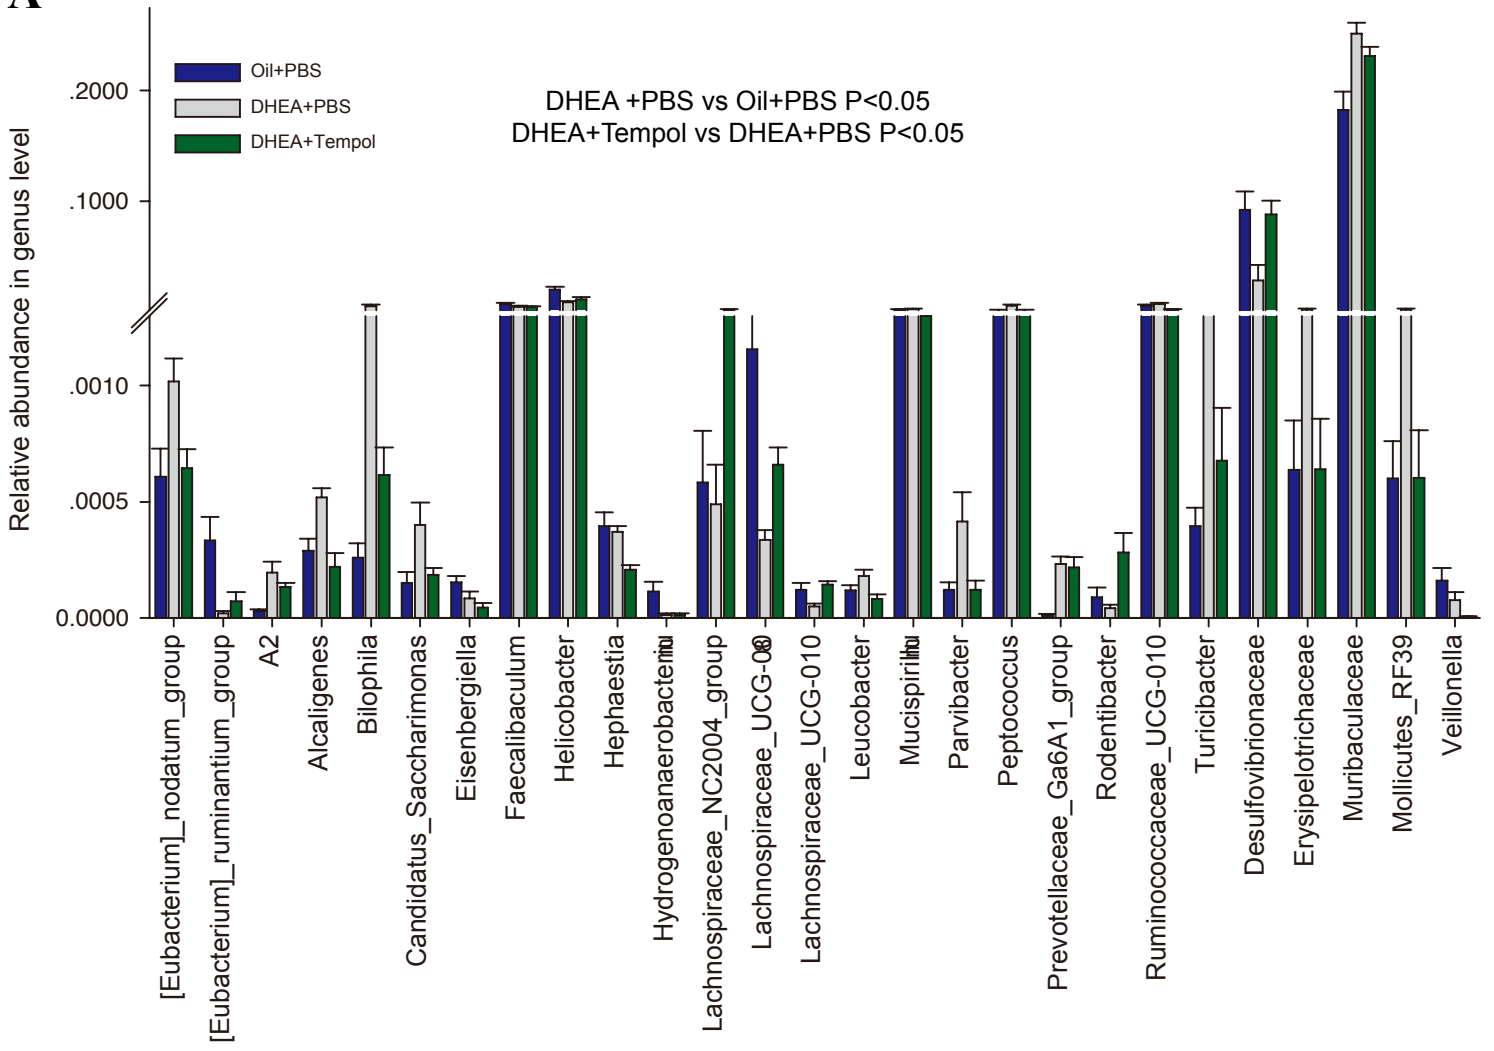

Supplement: mmc5.pdf [file mmc5.pdf]
